# Supplementary material for: Mitochondria-to-nucleus retrograde signaling drives formation of cytoplasmic chromatin and inflammation in senescence
Source: PubMed Central journal article supplement — Genes Dev. 2020 Mar 1;34(5-6):428–45. doi: 10.1101/gad.331272.119 (PMC7050483; doi:10.1101/gad.331272.119), 2020-03-01
Supplement: supp_gad.331272.119_Supplemental_Figure_S7.pdf [file supp_gad.331272.119_Supplemental_Figure_S7.pdf]

Related to Figure 1C

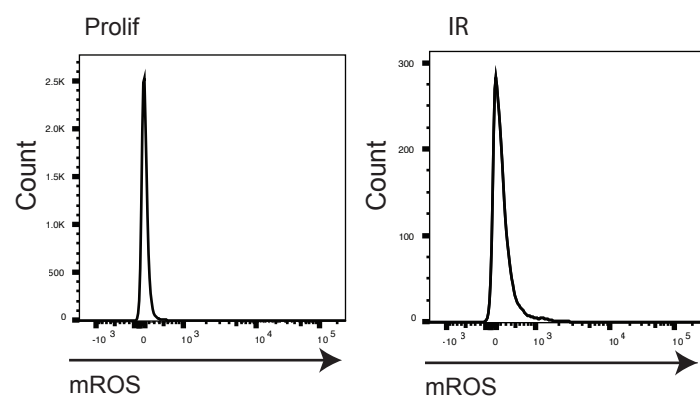

Related to Figure 2A

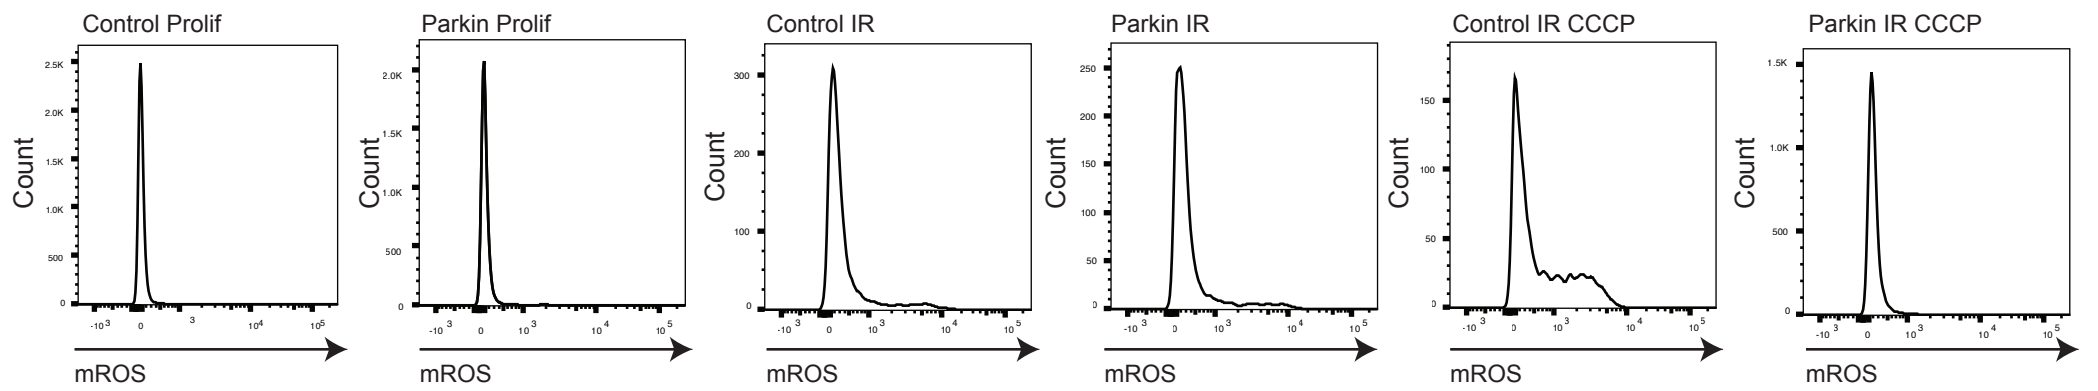

Related to Figure 2B

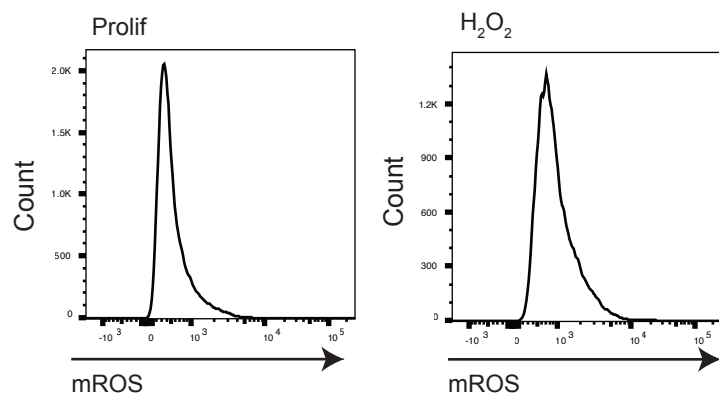

Related to Figure 2C

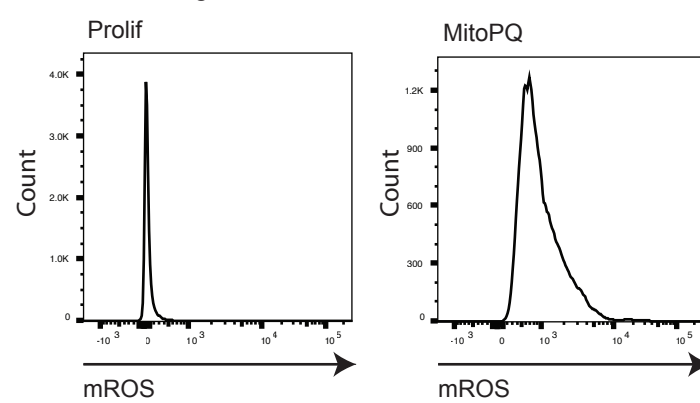

Related to Figure 2J

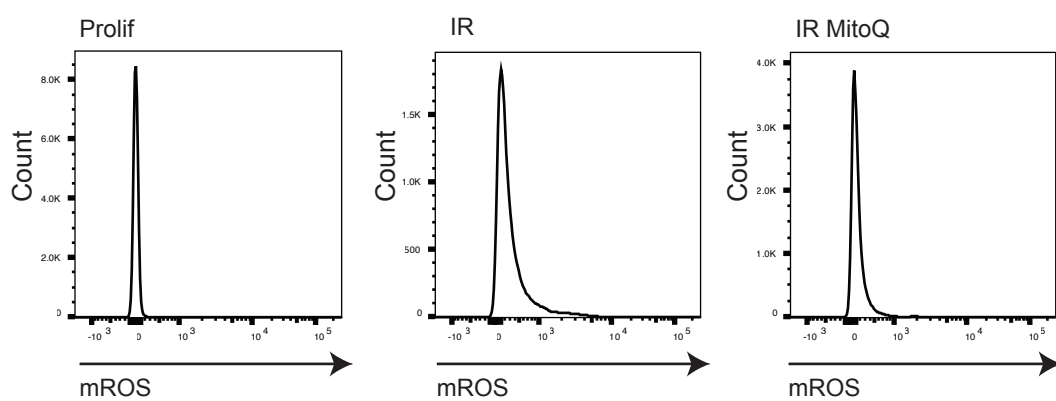

Related to Figure 3H

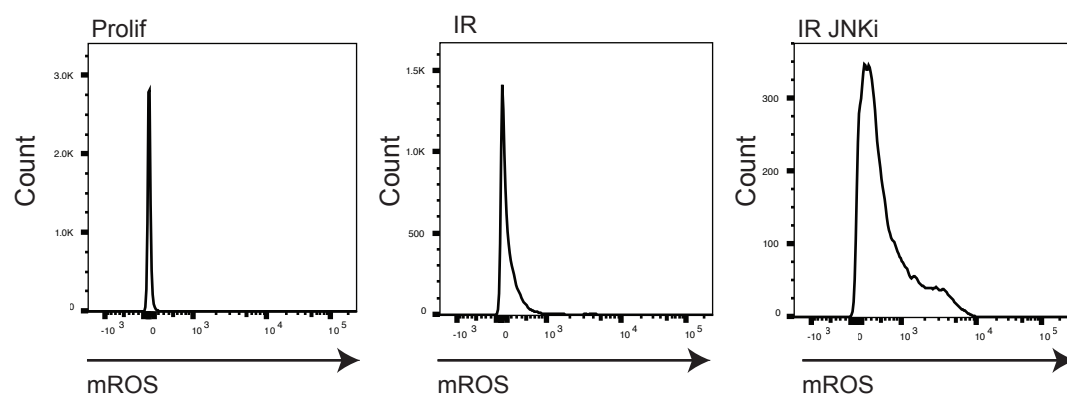

Supplemental Figure S7. Flow cytometry plots.
