# Supplementary figures and images for: Mitochondria-to-nucleus retrograde signaling drives formation of cytoplasmic chromatin and inflammation in senescence
Source: PubMed Central journal article supplement — Genes Dev. 2020 Mar 1;34(5-6):428–45. doi: 10.1101/gad.331272.119 (PMC7050483; doi:10.1101/gad.331272.119), 2020-03-01

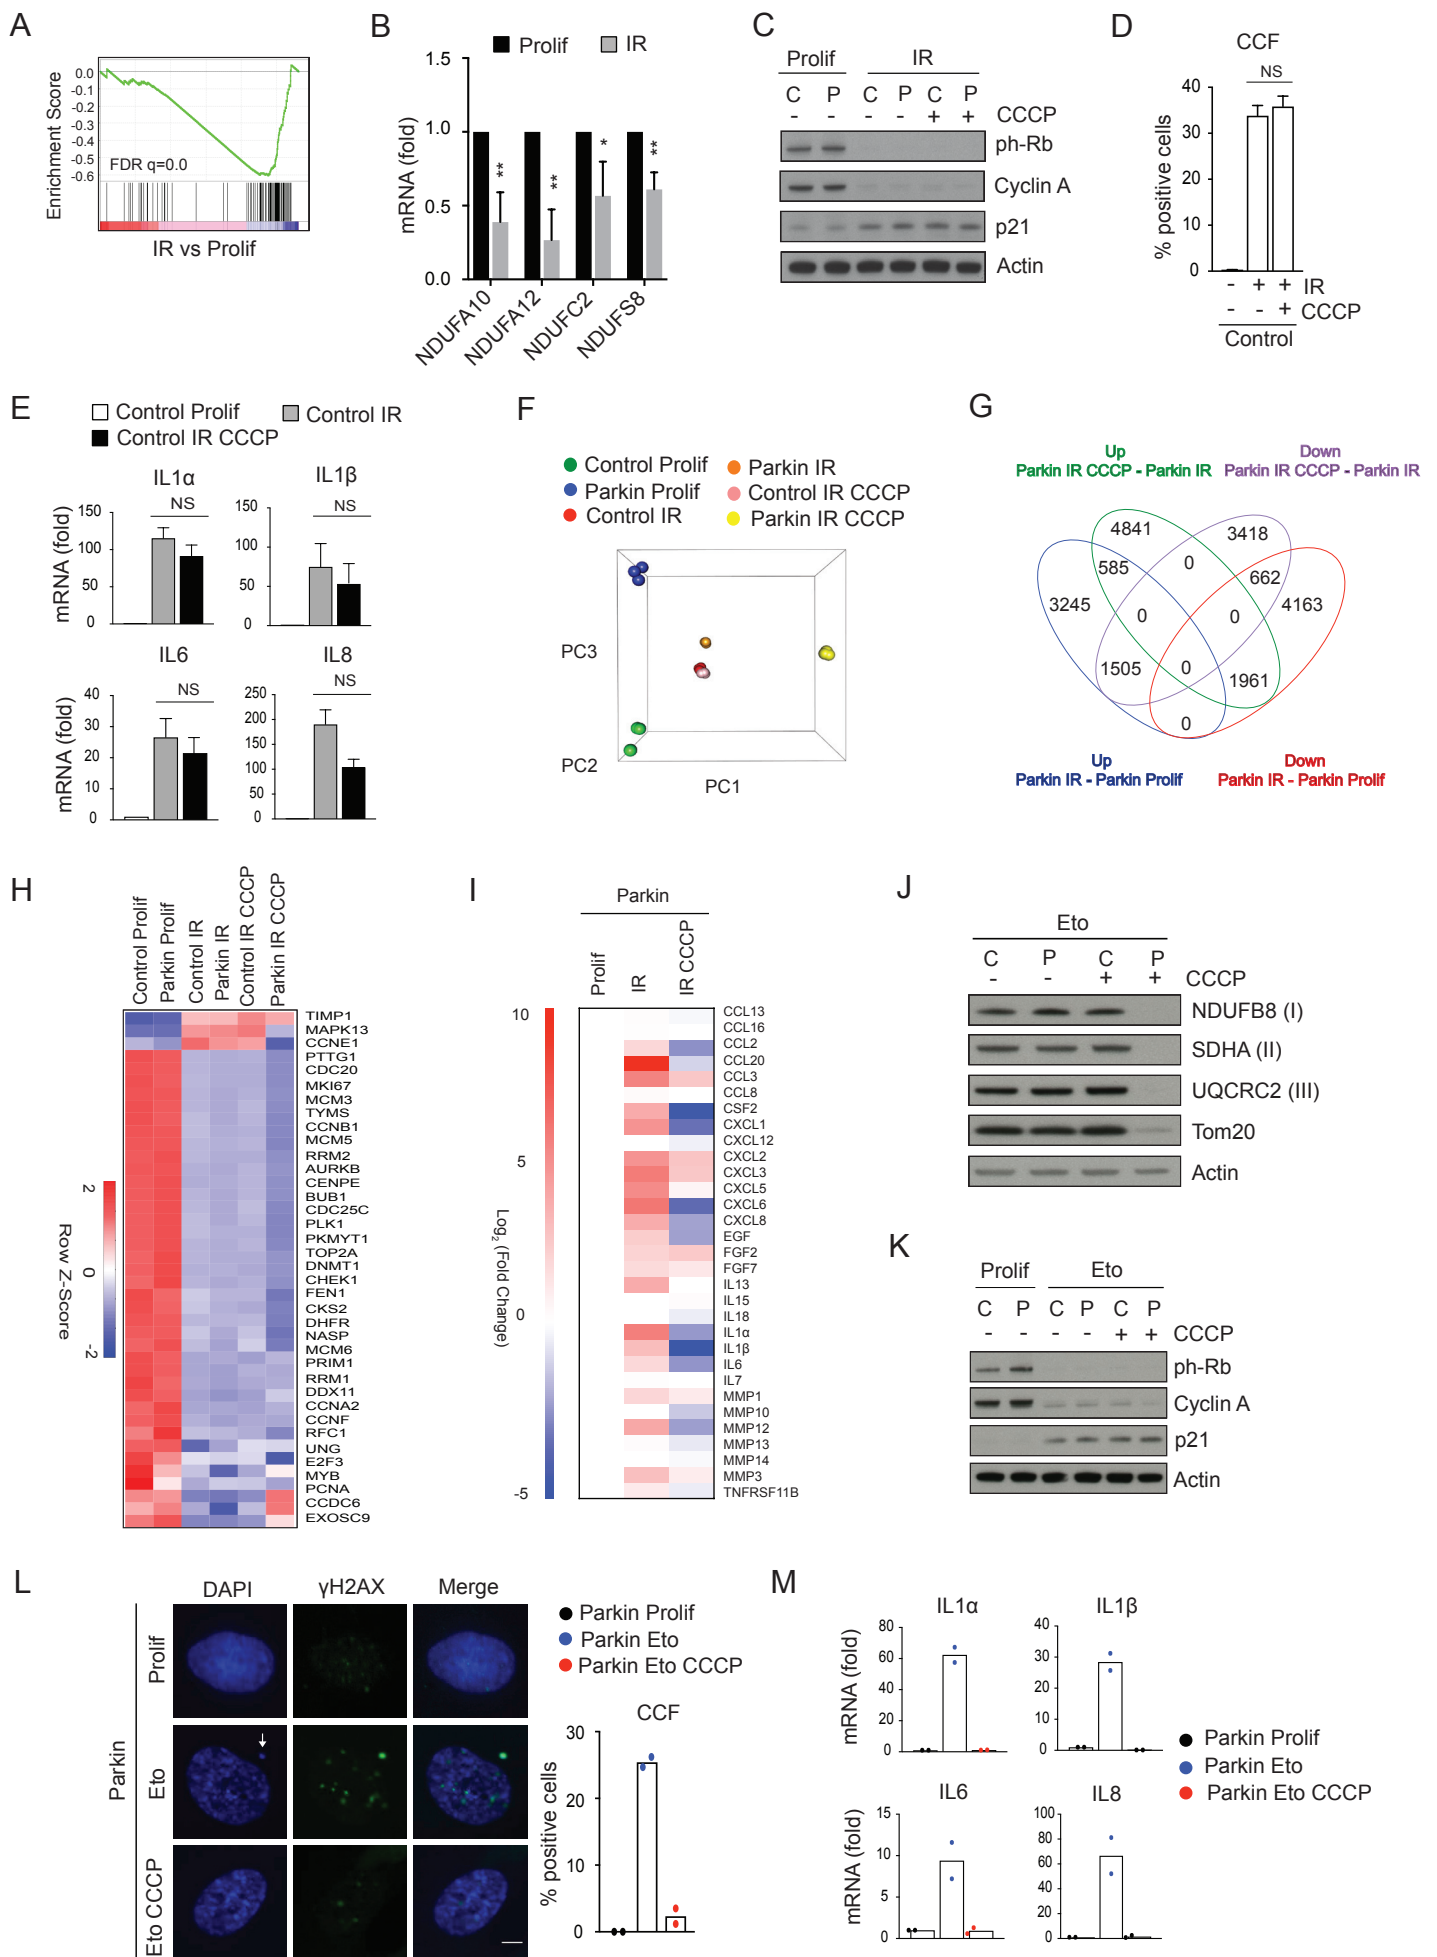

Supplemental Figure S1. Mitochondria are key factors for CCF formation in senescent cells.

Supplement: supp_gad.331272.119_Supplemental_Figure_S1.pdf [file supp_gad.331272.119_Supplemental_Figure_S1.pdf]

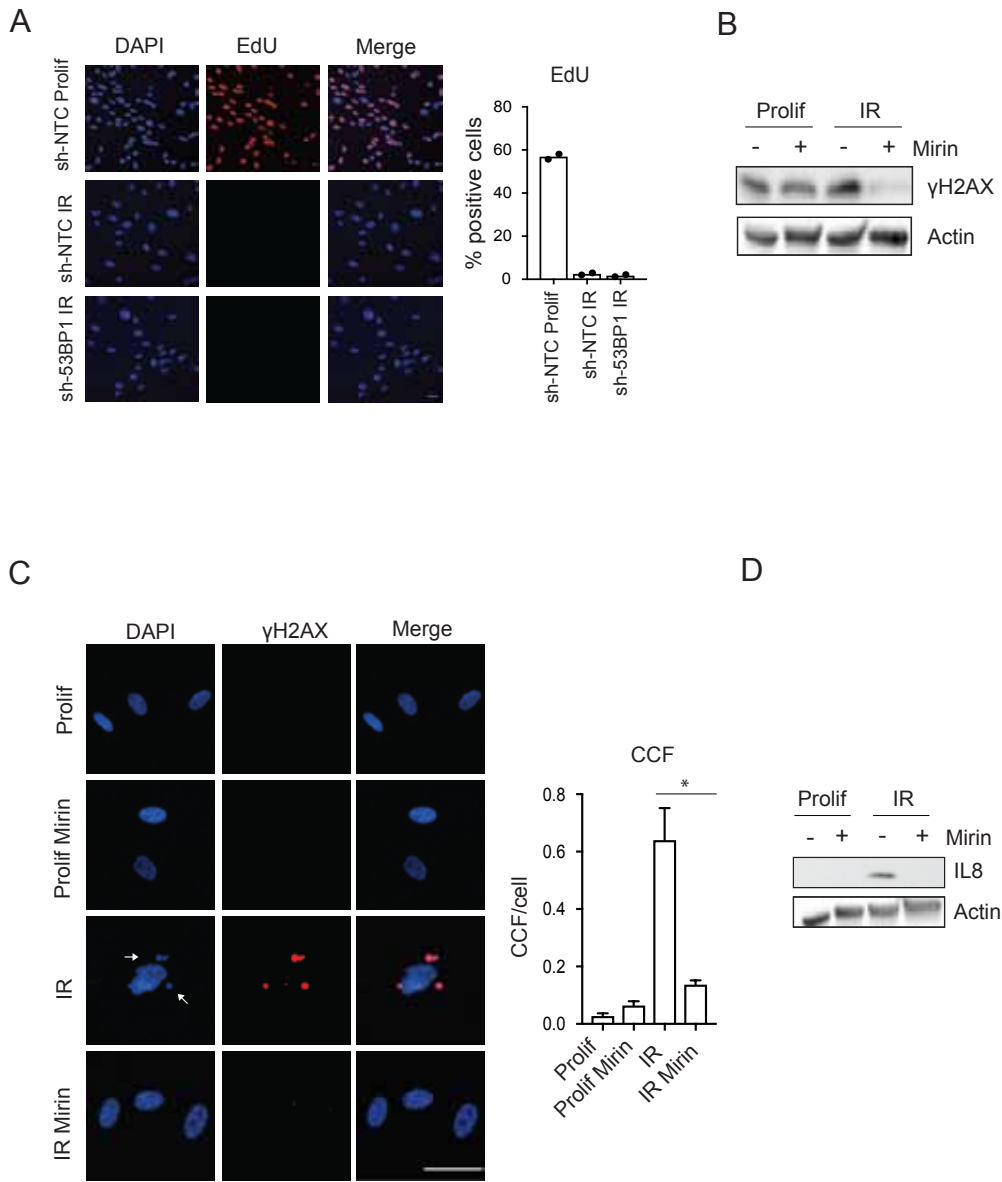

**Supplemental Figure S3. MRE11 inhibitor suppresses CCF formation and SASP.**

Supplement: supp_gad.331272.119_Supplemental_Figure_S3.pdf [file supp_gad.331272.119_Supplemental_Figure_S3.pdf]

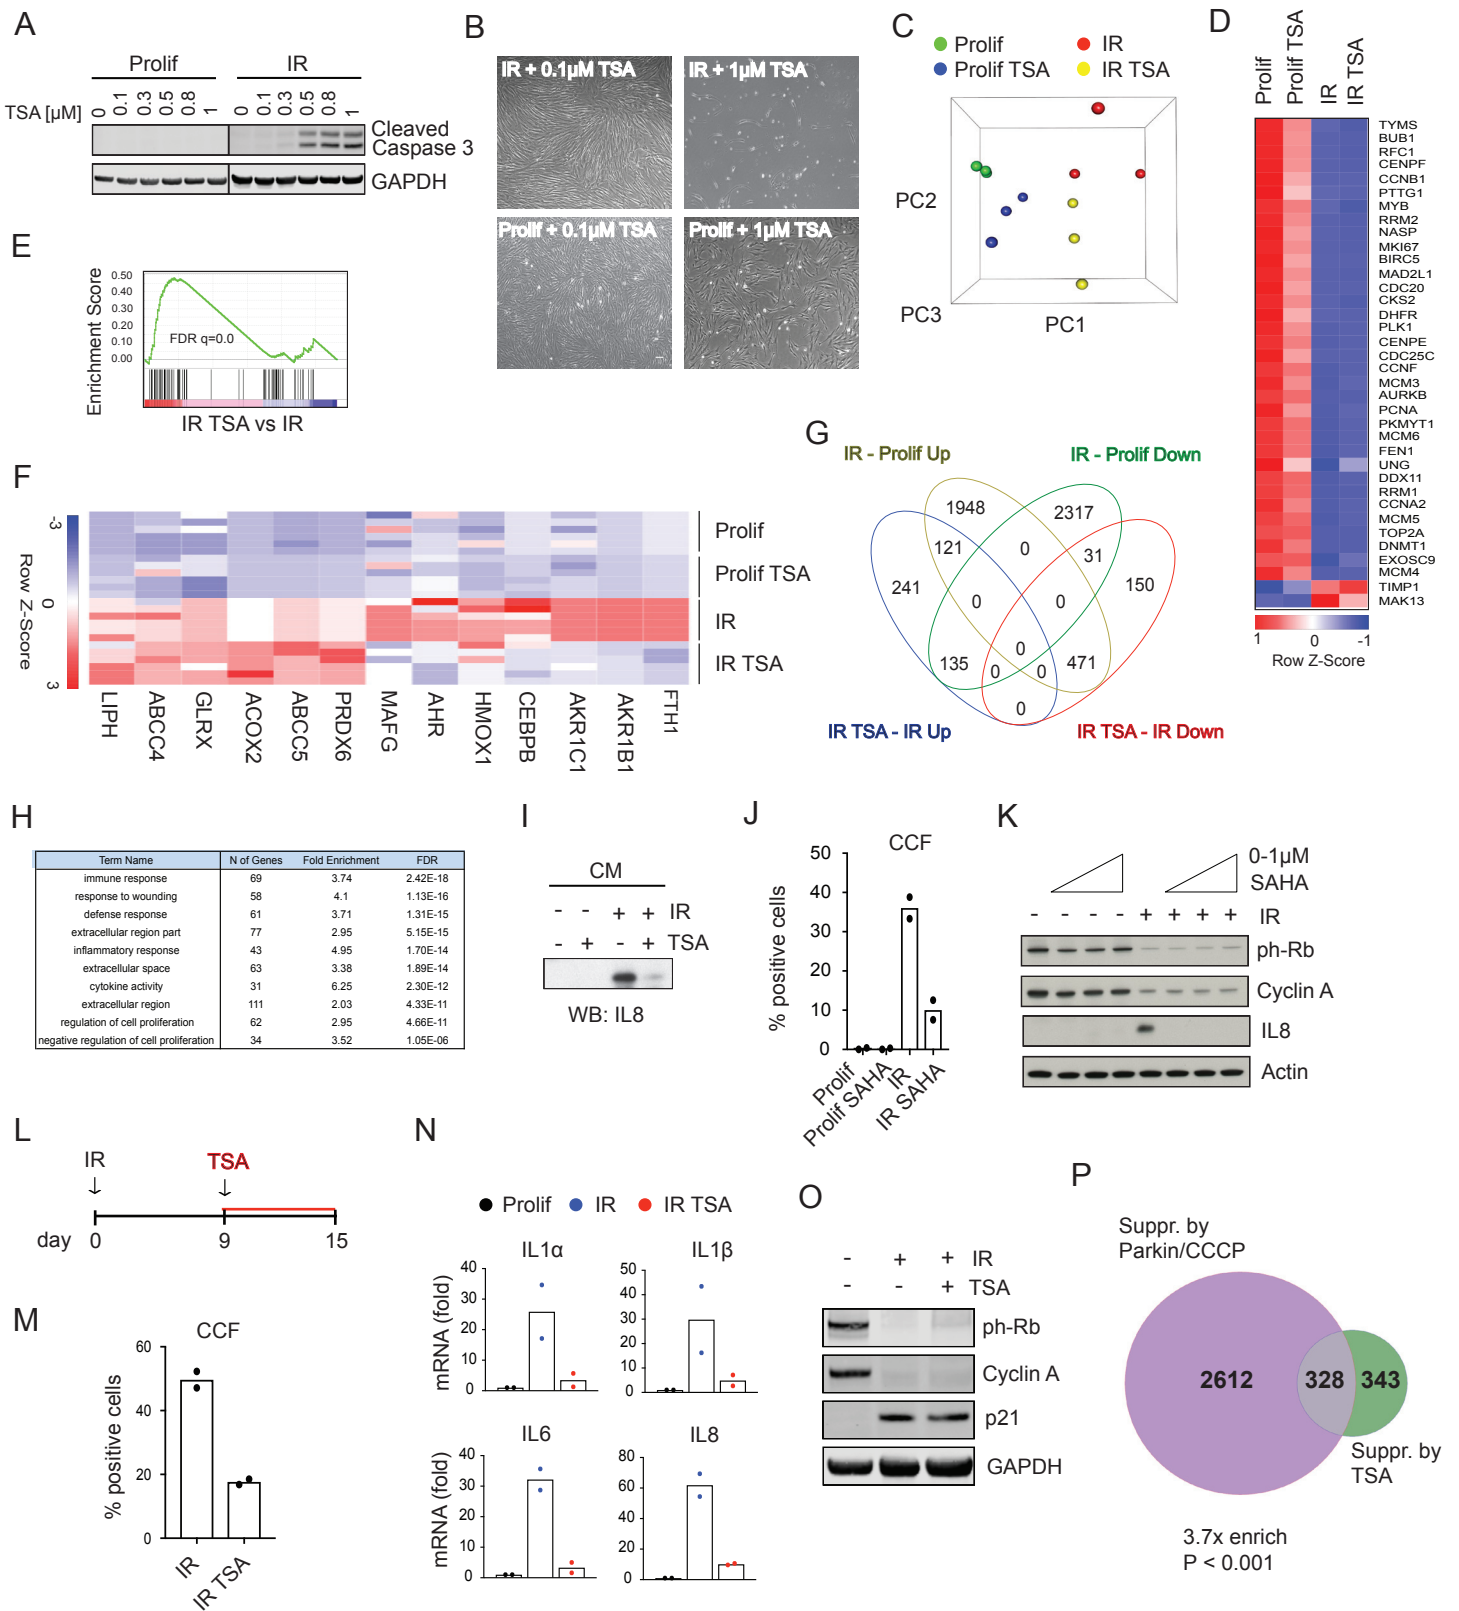

Supplemental Figure S4. HDAC inhibitors affect CCF formation and SASP.

Supplement: supp_gad.331272.119_Supplemental_Figure_S4.pdf [file supp_gad.331272.119_Supplemental_Figure_S4.pdf]

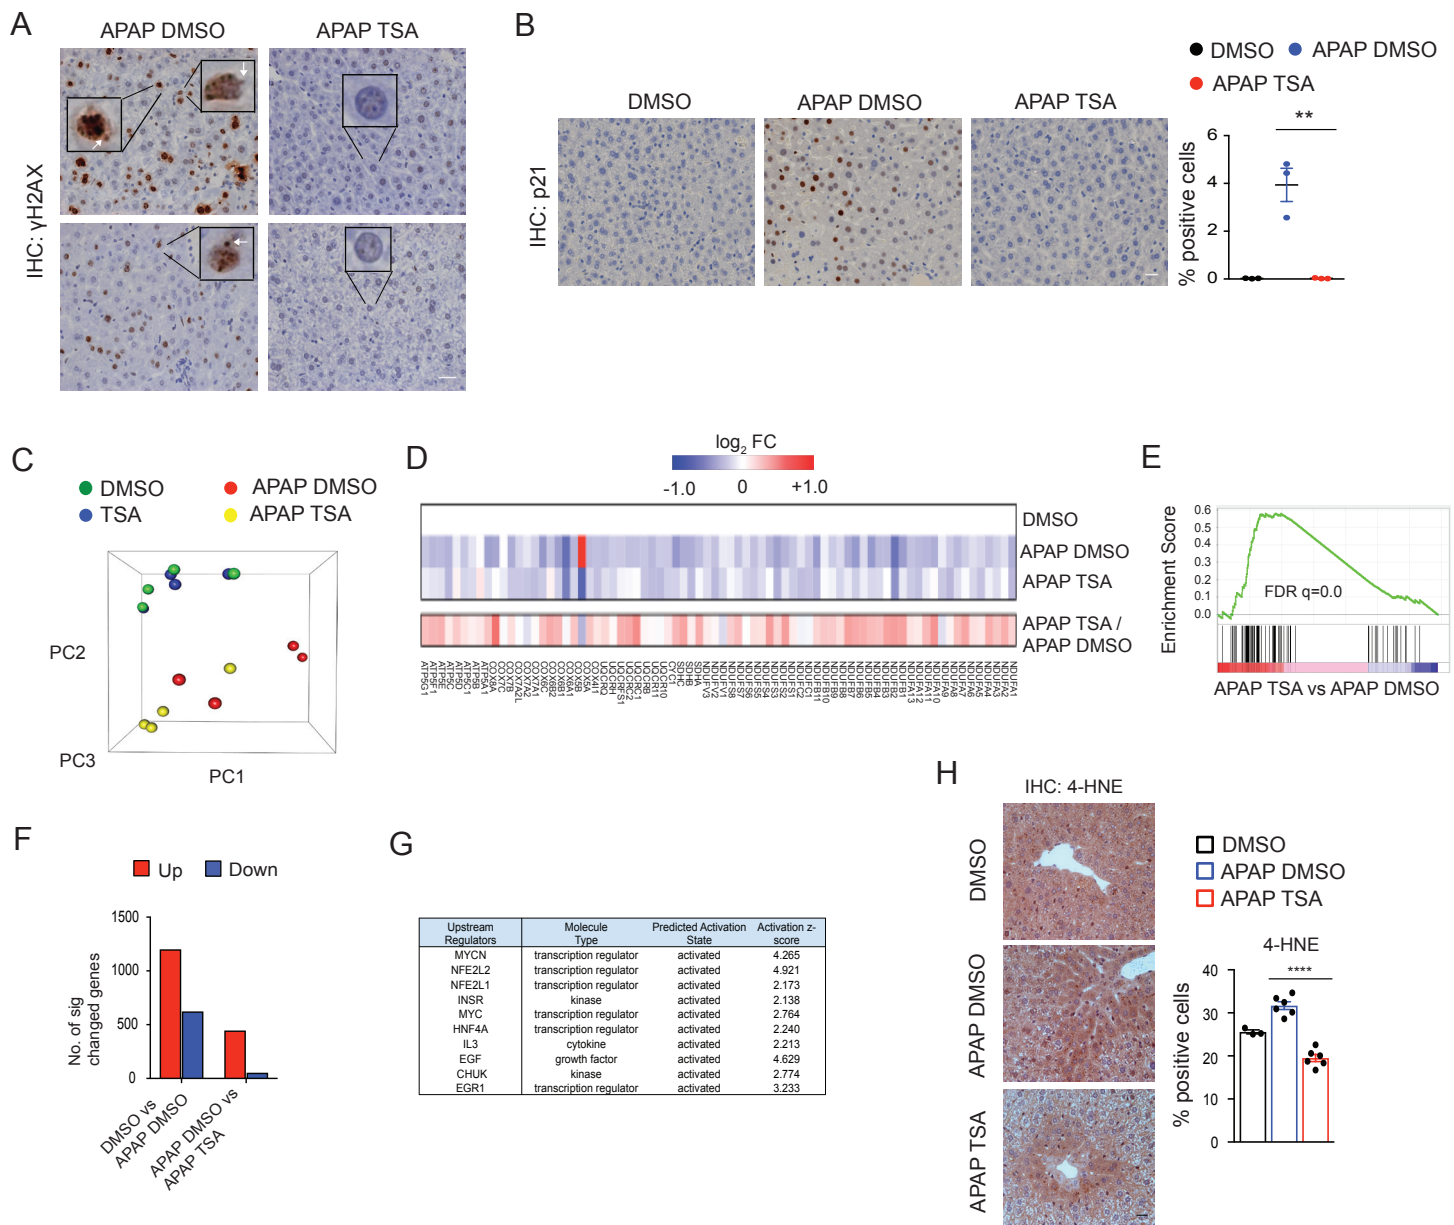

**Supplemental Figure S5. HDAC inhibitors impair inflammation in vivo.**

Supplement: supp_gad.331272.119_Supplemental_Figure_S5.pdf [file supp_gad.331272.119_Supplemental_Figure_S5.pdf]

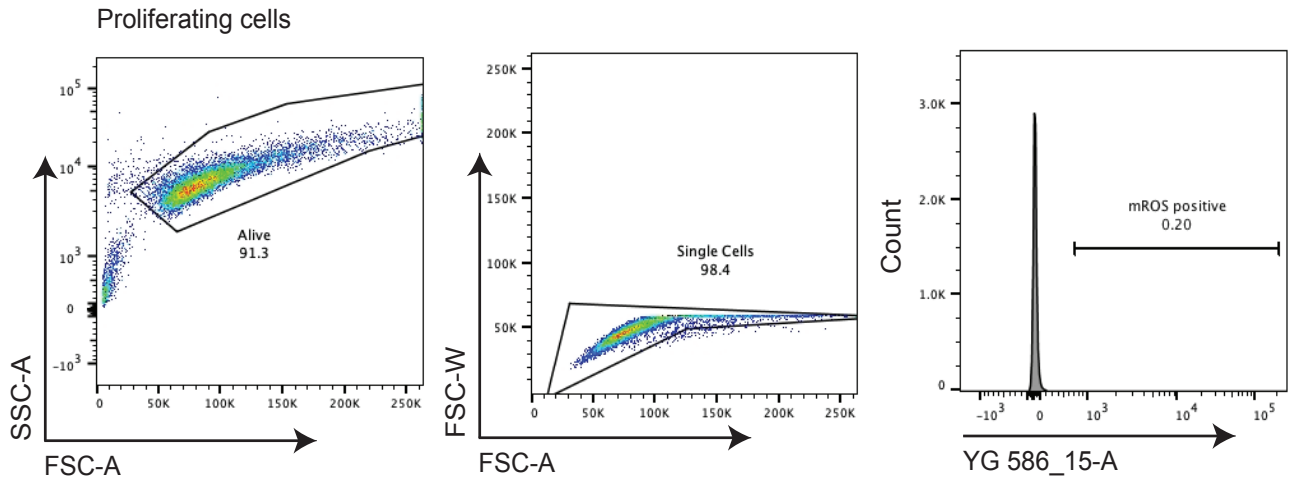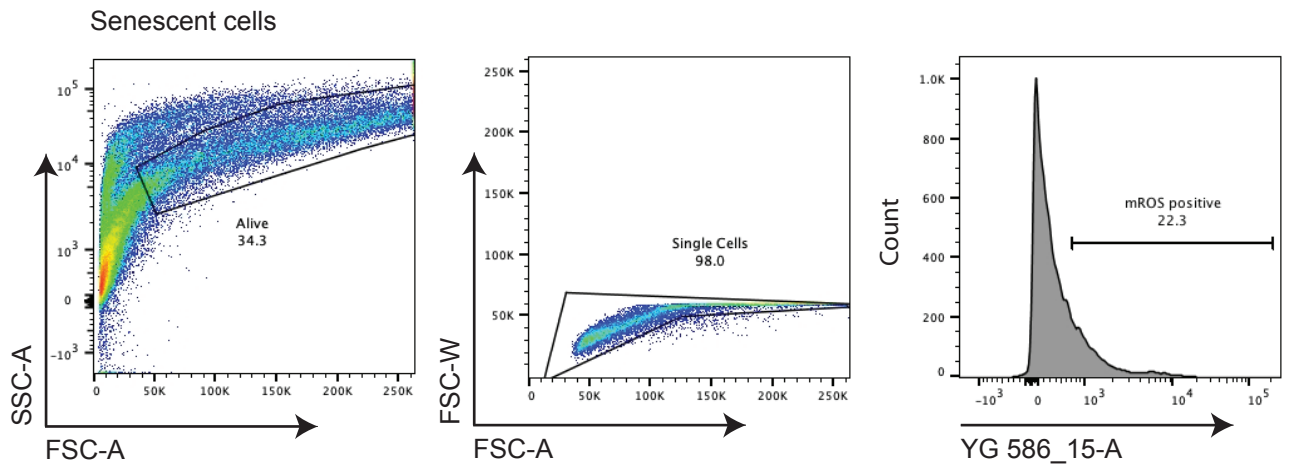

**Supplemental Figure S6. Gating strategy for flow cytometry.**

Supplement: supp_gad.331272.119_Supplemental_Figure_S6.pdf [file supp_gad.331272.119_Supplemental_Figure_S6.pdf]

Related to Figure 5I

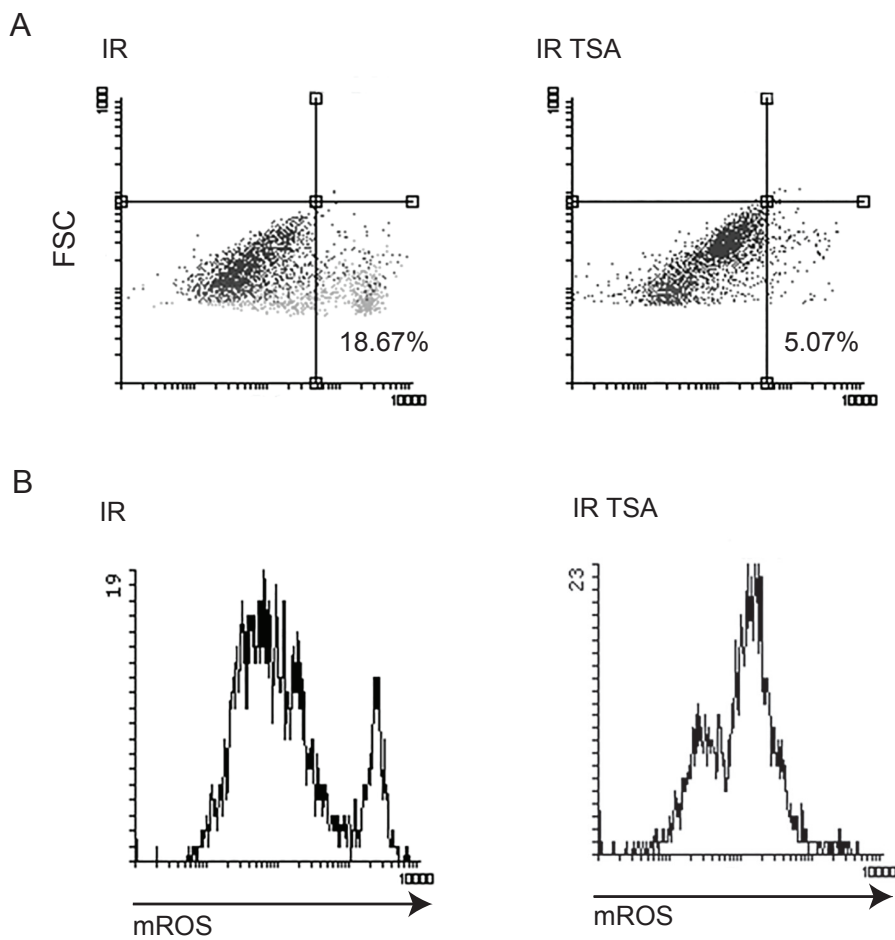

**Supplemental Figure S8. Flow cytometry gating strategy and plots.**

Supplement: supp_gad.331272.119_Supplemental_Figure_S8.pdf [file supp_gad.331272.119_Supplemental_Figure_S8.pdf]
